# Supplementary material for: An Ir(iii) cyclometalate-functionalized molecularly imprinted polymer: photophysics, photochemistry and chemosensory applications
Source: Royal Society of Chemistry journal article supplement (doi:10.1039/d3dt02347h), 2023-01-01
Supplement: d3dt02347h1.pdf [file d3dt02347h1.pdf]

# **Phosphorescent Cyclometalated Ir(III) Complex- Functionalized Molecularly-Imprinted Polymer for Specific Trimethylamine Detection**

Ruoyang Liu<sup>a</sup>, Shun-Cheung Cheng<sup>a</sup>, Chi-On Ng<sup>a</sup>, Yelan Xiao<sup>a,b</sup>, Kin-Man Tang<sup>a</sup>, Ka-Ming Tong<sup>a</sup>, Ngai-Yu Lei<sup>a</sup>, Chi-Chiu Ko<sup>a,\*</sup>

<sup>a</sup>*Department of Chemistry and State Key Laboratory of Marine Pollution, City University of Hong Kong, Hong Kong, China*

<sup>b</sup>*Shenzhen Key Laboratory for Nano-Biosensing Technology, Research Center for Biosensor and Nanotheranostic, School of Biomedical Engineering, Health Science Center, Shenzhen University, Shenzhen, Guangdong, China*

Email address: [vincecko@cityu.edu.hk](mailto:vincecko@cityu.edu.hk) (C.-C. Ko)

## **Supplementary Information**

## Contents

### 1. Experimental Section

### 2. Supplementary Figures

- Fig. S1** SEM images of **PTMA** and **PTMA-Ir**.
- Fig. S2** SEM images of the control polymers without TMA-imprinting cavities (**P** and **P-Ir**) prepared according to identical synthetic procedures for **PTMA** and **PTMA-Ir** except no imprinting template was used in the synthesis.
- Fig. S3** UV-vis reflectance spectra of **PTMA**, **Ir-2** and **PTMA-Ir** deposited on a quartz plate with a 1-cm circular recess.
- Fig. S4** FT-IR spectra of **PTMA** and **PTMA-Ir**.
- Fig. S5** (a) XPS survey spectrum of **PTMA** and deconvoluted fittings of the high resolution (b) C 1s, (c) O 1s and (d) Cl 2p signals.
- Fig. S6** (a) XPS survey spectrum of **PTMA-Ir** and deconvoluted fittings of the high resolution (b) C 1s, (c) O 1s, (d) N 1s and (e) Ir 4f signals.
- Fig. S7** Nanosecond time-resolved emission spectra of **PTMA-Ir** suspended in H<sub>2</sub>O ( $\lambda_{\text{ex}} = 355$  nm).
- Fig. S8** Overlaid emission spectra of **PTMA-Ir** and **PTMA** suspended in H<sub>2</sub>O (0.2 mg polymer in 3 mL H<sub>2</sub>O) ( $\lambda_{\text{ex}} = 350$  nm)
- Fig. S9** Extracted-ion chromatograms (XIC) of derivatized TMA and TEA monitored at their specific multiple reaction monitoring (MRM) transitions in the study of **PTMA-Ir**. (a), (b) and (c) are spiked sample replicates, and (d) is the negative control.
- Fig. S10** Extracted-ion chromatograms (XIC) of derivatized TMA and TEA monitored at their specific MRM transitions in the study of **P-Ir**. (a), (b) and (c) are spiked sample replicates, and (d) is the negative control.
- Fig. S11** Emission spectra of **PTMA-Ir** suspended in an acidic aqueous solution (pH = 2) after incubation in different concentrations of TMA·HCl for 120 min ( $\lambda_{\text{ex}} = 350$  nm).

- Fig. S12** Emission spectra of **Ir-2** in CH<sub>3</sub>CN/H<sub>2</sub>O (3:2 v/v) after incubation with different concentrations of TMA·HCl ( $\lambda_{\text{ex}} = 350$  nm)
- Fig. S13** Emission spectra of **T-Ir** upon exposure to different concentrations of TMA vapor under an air atmosphere ( $\lambda_{\text{ex}} = 350$  nm).
- Fig. S14** Time-dependent emission spectra of **PTMA-Ir** under an argon atmosphere upon exposure to 634 ppm TMA vapor ( $\lambda_{\text{ex}} = 350$  nm).
- Fig. S15** Emission responses of **T-Ir** under an air atmosphere upon exposure to 1800 ppm of TMA vapor and removal from TMA vapor over five cycles.
- Fig. S16** Emission quenching of **T-Ir** under an argon atmosphere upon exposure to 3950 ppm vapor of TMA and saturated vapor of other interfering reagents at 20 °C [TEA (~75,000 ppm), DIPEA (~14,100 ppm), acetic acid (~14,800 ppm), DMF (~3,800 ppm), THF (~188,000 ppm) and MeCN (~108,600 ppm)].
- Fig. S17** Emission quenching of **T-Ir** under an air atmosphere upon exposure to 1800 ppm vapor of TMA and other interfering reagents.
- Fig. S18** Emission spectra of **Ir-2** loaded on a filter paper upon exposure to different concentrations of TMA vapor under an argon atmosphere ( $\lambda_{\text{ex}} = 300$  nm).
- Fig. S19** Emission spectra of **Ir-2** loaded on a filter paper upon exposure to different concentrations of TMA vapor under an air atmosphere ( $\lambda_{\text{ex}} = 300$  nm).
- Fig. S20** <sup>1</sup>H NMR spectra of (a) [**Ir-1**] in (CD<sub>3</sub>)<sub>2</sub>CO and (b) [**Ir-2**] in CDCl<sub>3</sub>.
- Fig. S21** Positive ESI mass spectrum of **Ir-1**. The inset shows the expanded ion cluster at  $m/z = 713.2$  and simulated isotope pattern based on the molecular formulation of **Ir-1**.
- Fig. S22** Positive ESI mass spectrum of **Ir-2**. The inset shows the expanded ion cluster at  $m/z = 741.2$  and simulated isotope pattern based on the molecular formulation of **Ir-2**.
- Table S1.** Comparison of **PTMA-Ir** sensor with recently reported TMA sensors

### 3. References

## 1. Experimental Section

**{Ir(ppy)<sub>2</sub>[phen(OH)<sub>2</sub>]}PF<sub>6</sub> (Ir-1).** <sup>1</sup>H NMR (300 MHz, (CD<sub>3</sub>)<sub>2</sub>CO): δ 8.38 (2H, s, 5-, 6-H's of phenanthroline), 8.22 (2H, d, *J* = 8.1 Hz, two 6-pyridyl H's of ppy), 7.89 (6H, m, two 3-pyridyl H's of ppy, two 4-pyridyl H's of ppy and two 2-phenyl H's of ppy), 7.80 (2H, d, *J* = 5.7 Hz, 3-, 8-H's of phenanthroline), 7.31 (2H, d, *J* = 6.1 Hz, 2-, 9-H's of phenanthroline), 7.05 (4H, m, two 3-phenyl H's of ppy and two 4-phenyl H's of ppy), 6.93 (2H, m, two 5-pyridyl H's of ppy), 6.48 (2H, d, *J* = 7.4 Hz, two 5-phenyl H's of ppy), 3.83 (s, 2H, OH). Positive-ion ESI-MS: *m/z* 713.2 [M]<sup>+</sup>; IR (KBr disc / cm<sup>-1</sup>): 3059 br (O-H), 831 (P-F).

**{Ir(ppy)<sub>2</sub>[(OMe)<sub>2</sub>phen]}PF<sub>6</sub> (Ir-2).** <sup>1</sup>H NMR (300 MHz, CDCl<sub>3</sub>): δ 8.36 (2H, s, 5-, 6-H's of phenanthroline), 8.07 (2H, d, *J* = 6.0 Hz, two 6-pyridyl H's of ppy), 7.89 (2H, d, *J* = 8.3 Hz, 3-, 8-H's of phenanthroline), 7.70 (4H, d, *J* = 7.4 Hz, two 3-pyridyl H's of ppy and two 4-pyridyl H's of ppy), 7.50 (2H, d, *J* = 6.1 Hz, two 2-phenyl H's of ppy), 7.16 (2H, d, *J* = 6.1 Hz, 2-, 9-H's of phenanthroline), 7.05 (2H, m, two 5-pyridyl H's of ppy), 6.94 (4H, m, two 3-phenyl H's of ppy and two 4-phenyl H's of ppy), 6.41 (2H, d, *J* = 7.5 Hz, two 5-phenyl H's of ppy), 4.19 (6H, s, CH<sub>3</sub>). Positive-ion ESI-MS: *m/z* 741.2 [M]<sup>+</sup>; IR (KBr disc / cm<sup>-1</sup>): 846 (P-F).

### Physical Measurements and Instrumentation.

Instrumentation for NMR, IR, UV-vis diffuse reflectance, time-resolved emission and Raman spectroscopy, elemental analysis, TGA and ICP-OES are carried out according to our previously reported literature [1,2]. For Raman spectra, excitation beam (309 nm) is produced by a Nd:YAG laser (Spectra-Physics LAB-170). Solvent signals are subtracted and frequencies are calibrated by methanol Raman bands.

The concentrations of TMA·HCl are quantified by LC-MS using Agilent 1200 HPLC equipped with Sciex API 2000 MS/MS system. Ethyl bromoacetate was used to derivatize TMA, to improve ESI-MS/MS detection and separation of TMA. A portion of 125 μL supernatant was mixed with 425 μL of 20% concentrated ammonium solution, triethylamine (TEA) as an internal standard in acetonitrile and 100 μL of 4.0 M ethyl bromoacetate in acetonitrile. The mixture was stand overnight at 25 °C. Thereafter, 250 μL of MeCN/Milli-Q water/HCOOH (50:50:1 v/v/v) was added to terminate the reaction. The solution was ready for LC-MS/MS analysis. The chromatographic separation was performed using a Water HILIC silica column (3 μm, 2.1 × 100 mm) with isocratic elution using 10 mM HCOONH<sub>4</sub> in water / 0.1% HCOOH in MeCN (v/v 1:9) as eluent (flow rate: 400 μL/min). The LC-MS calibration curve is shown below:

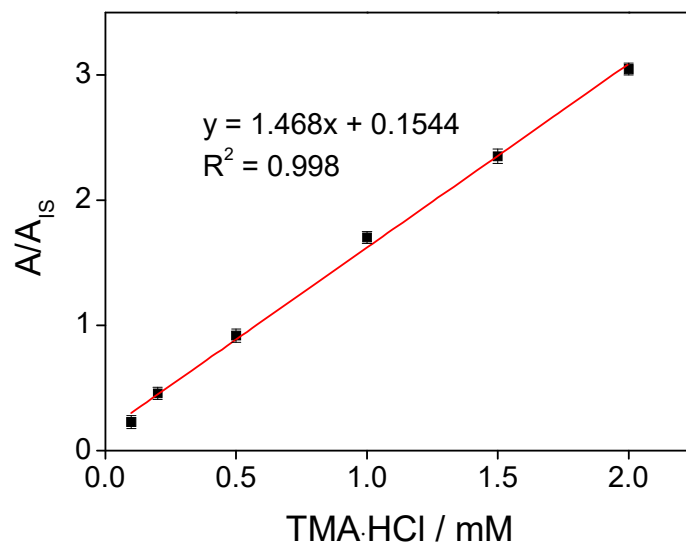

A: Peak area, IS: internal standard, triethylamine

Emission quenching experiments with different concentrations of TMA·HCl are conducted in a quartz cell, degassed by bubbling argon. The quenching rate constants are calculated through the Stern-Volmer equation:

$$\tau_0/\tau = 1 + k_q\tau_0[Q]$$

$\tau_0$  and  $\tau$  are emission lifetimes without and with quencher,  $[Q]$  is quencher concentration in  $\text{mol dm}^{-3}$ , and  $k_q$  is the bimolecular quenching rate constant.

### TMA-sensing study

The emission titration was performed on an Edinburgh Instruments FLS980 spectrometer. The **PTMA-Ir** suspended in an aqueous solution was incubated with different concentrations of TMA·HCl for 2 hours, and degassed before the emission measurement. To test the amine vapor sensing, **PTMA-Ir** adsorbed on filter paper (**T-Ir**) was prepared by dipping a filter paper strip (23 mm × 13mm) on a **PTMA-Ir**-suspended solution (1 mg **PTMA-Ir** in 10 mL *n*-hexane). The emission of **PTMA-Ir** on **T-Ir** in a closed quartz cuvette with different concentrations of TMA vapor prepared by the injection of saturated TMA vapor was examined. Saturated TMA vapor is prepared by dissolving TMA·HCl (1 g) in NaOH solution (600 mg NaOH in 10 mL milliQ water) in a closed system at 25 °C for 3 hours. The injected TMA contents are verified by FT-IR spectroscopy with a 10-cm infrared gas cell according to the peak area at  $1459 \text{ cm}^{-1}$  as shown in the following figures.

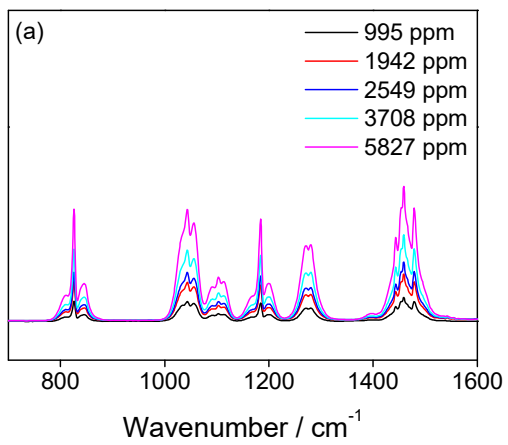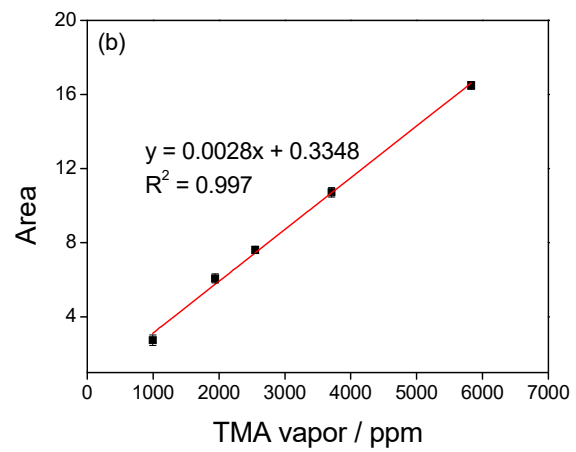

(a) FT-IR spectra and (b) calibration curve of TMA vapor (25 °C).

## 2. Supplementary figures

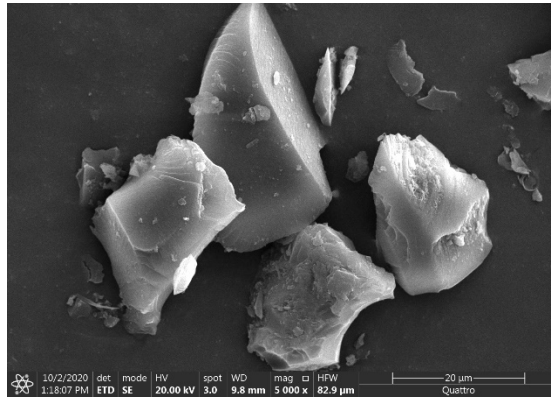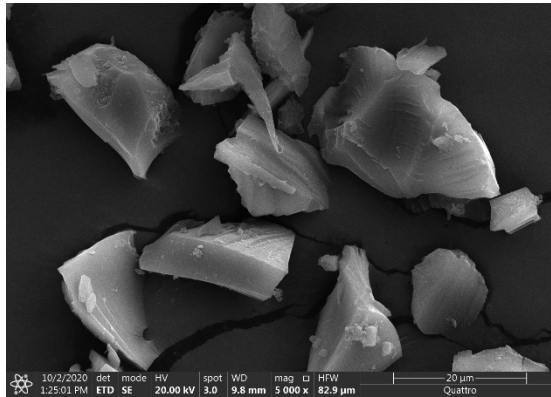

**Fig. S1** SEM images of (a) PTMA and (b) PTMA-Ir.

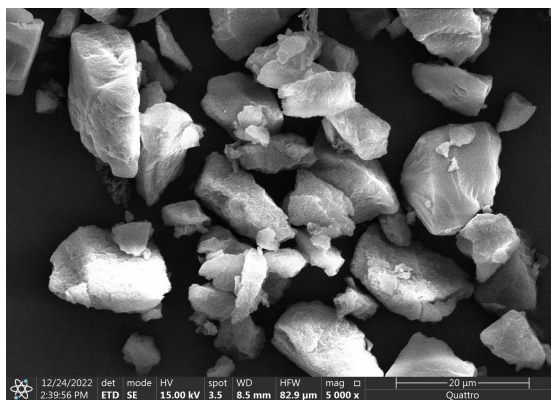

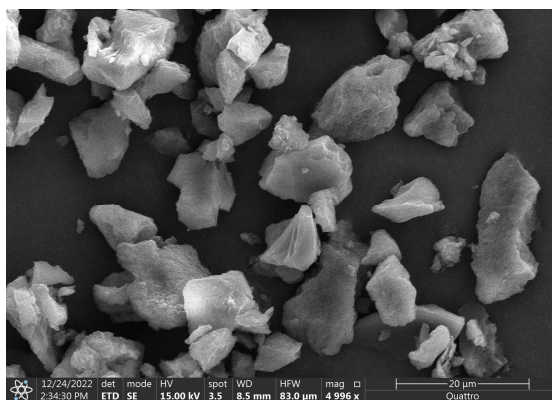

**Fig. S2** SEM images of the control polymers without TMA-imprinting cavities (**P** and **P-Ir**) prepared according to identical synthetic procedures for **PTMA** and **PTMA-Ir** except no imprinting template was used in the synthesis.

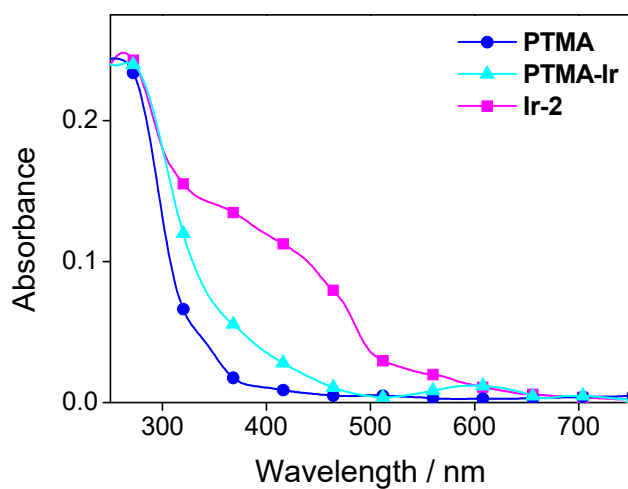

**Fig. S3** UV-vis reflectance spectra of **PTMA**, **Ir-2** and **PTMA-Ir** deposited on a quartz plate with a 1-cm circular recess.



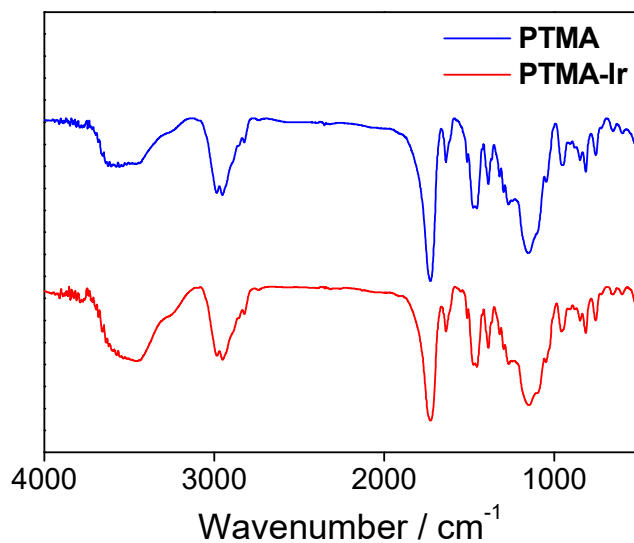

**Fig. S4** FT-IR spectra of **PTMA** and **PTMA-Ir**.

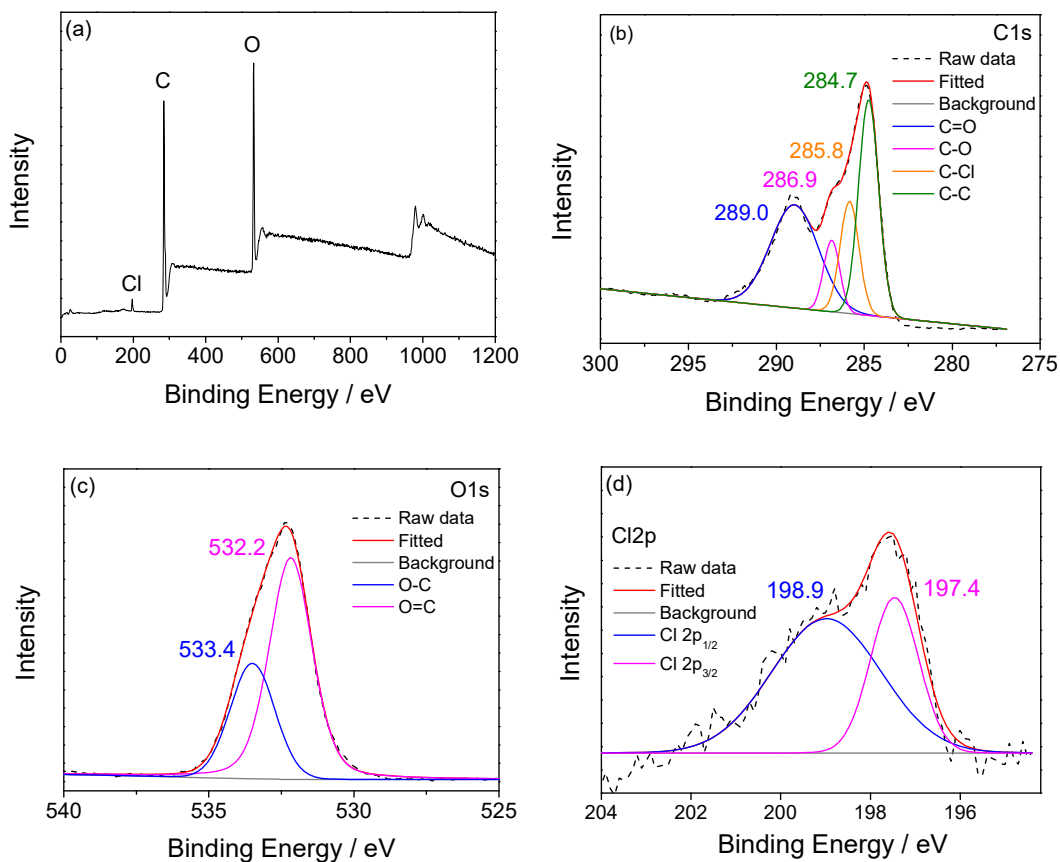

**Fig. S5** (a) XPS survey spectrum of **PTMA** and deconvoluted fittings of the high resolution (b) C 1s, (c) O 1s and (d) Cl 2p signals.

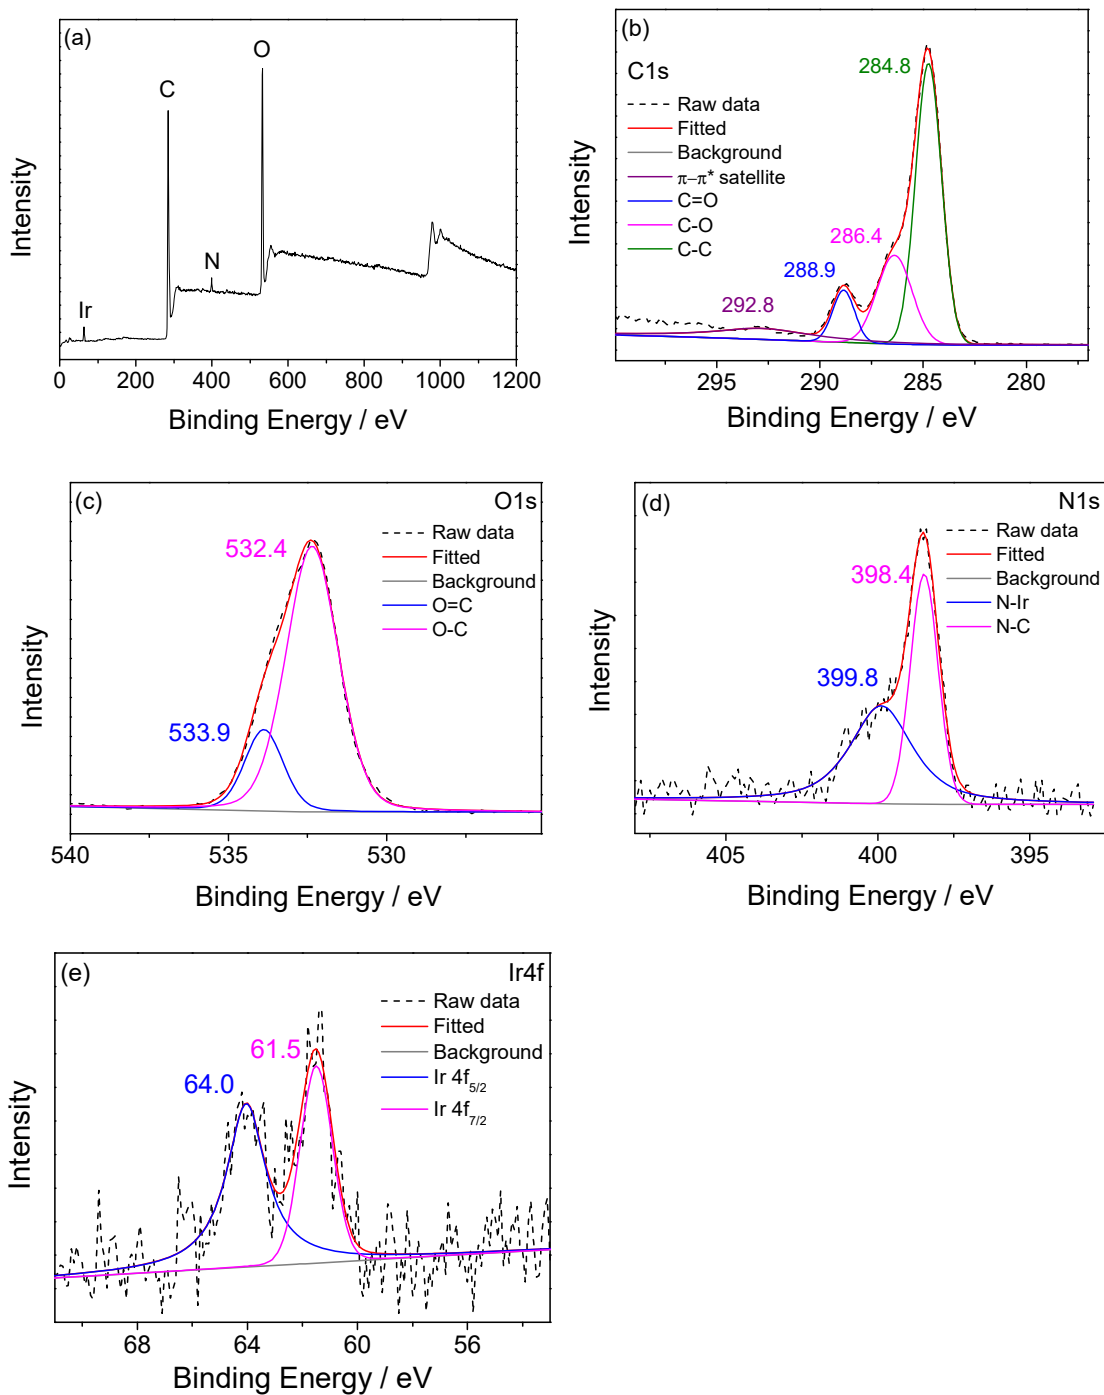

**Fig. S6** (a) XPS survey spectrum of PTMA-Ir and deconvoluted fittings of the high resolution (b) C 1s, (c) O 1s, (d) N 1s and (e) Ir 4f signals.

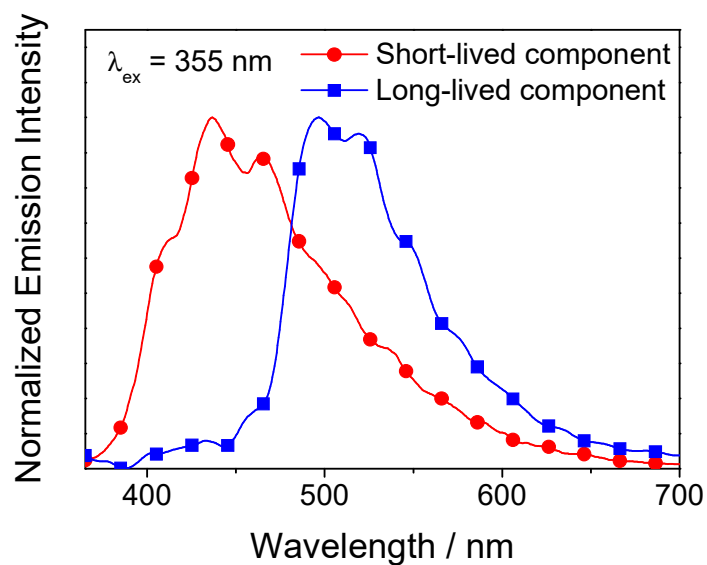

**Fig. S7** Nanosecond time-resolved emission spectra of **PTMA-Ir** suspended in  $\text{H}_2\text{O}$  ( $\lambda_{ex} = 355 \text{ nm}$ ).

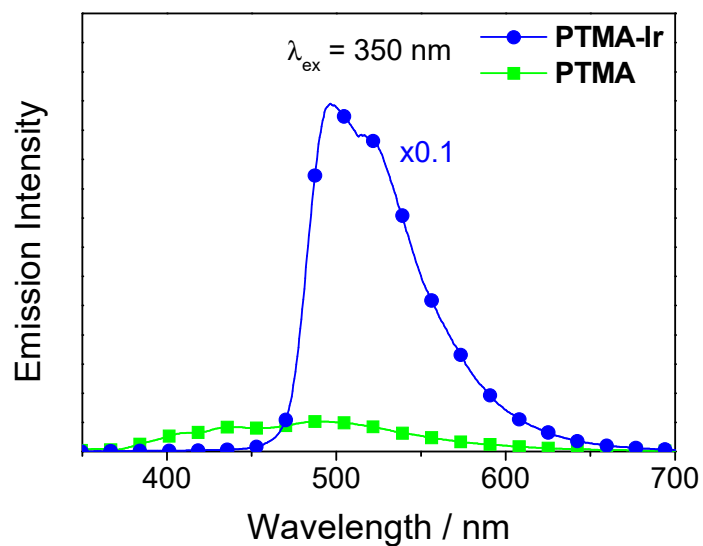

**Fig. S8** Overlaid emission spectra of **PTMA-Ir** and **PTMA** suspended in  $\text{H}_2\text{O}$  (0.2 mg polymer in 3 mL  $\text{H}_2\text{O}$ ) ( $\lambda_{ex} = 350 \text{ nm}$ ).

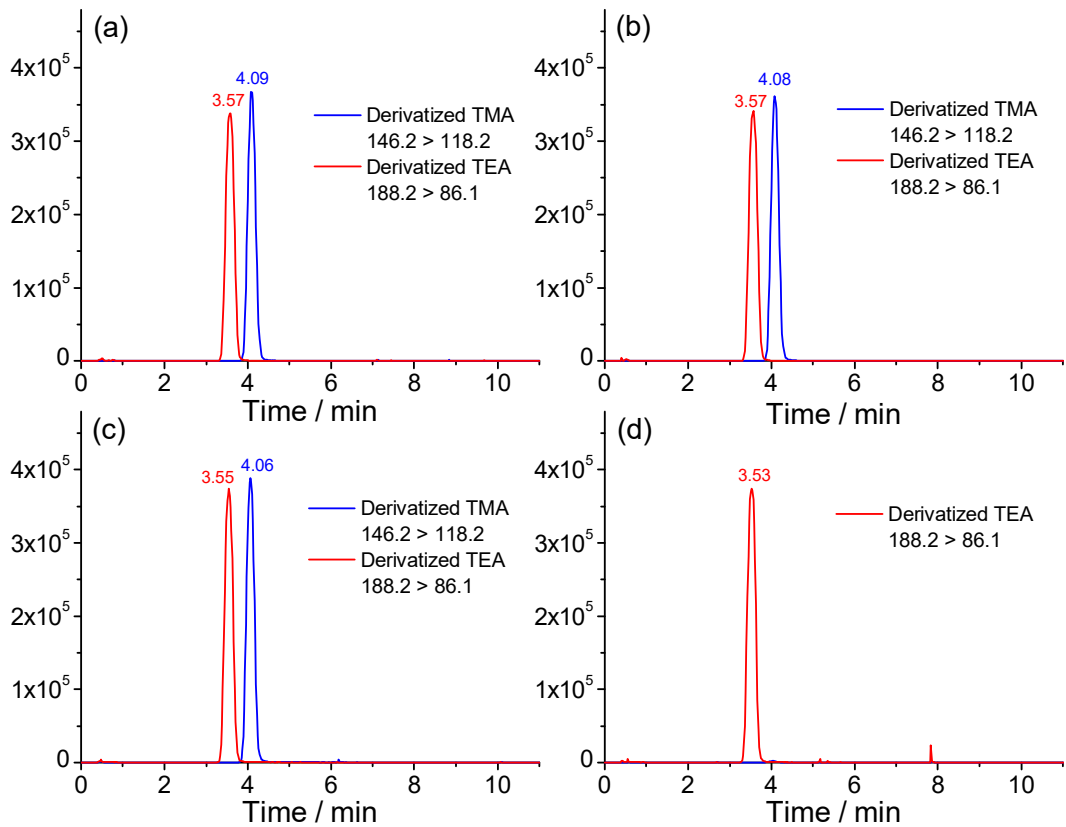

**Fig. S9** Extracted-ion chromatograms (XIC) of derivatized TMA and TEA monitored at their specific multiple reaction monitoring (MRM) transitions in the study of **PTMA-Ir**. (a), (b) and (c) are spiked sample replicates, and (d) is the negative control.

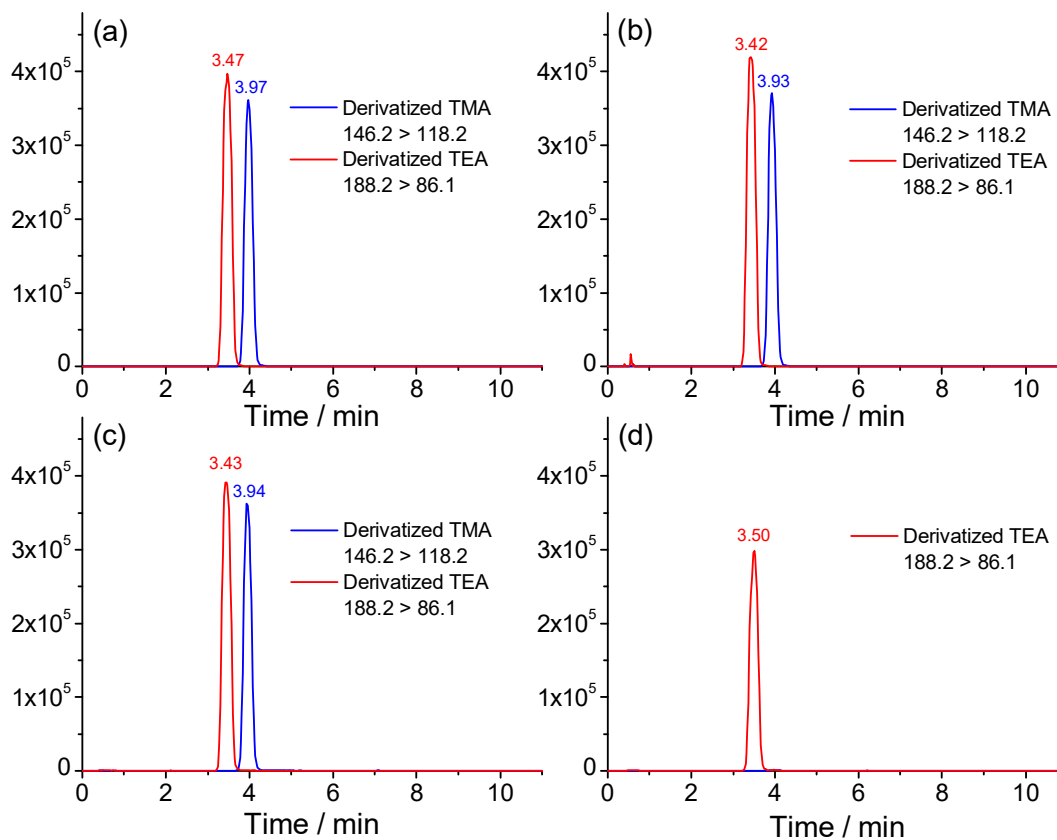

**Fig. S10** Extracted-ion chromatograms (XIC) of derivatized TMA and TEA monitored at their specific MRM transitions in the study of **P-Ir**. (a), (b) and (c) are spiked sample replicates, and (d) is the negative control.

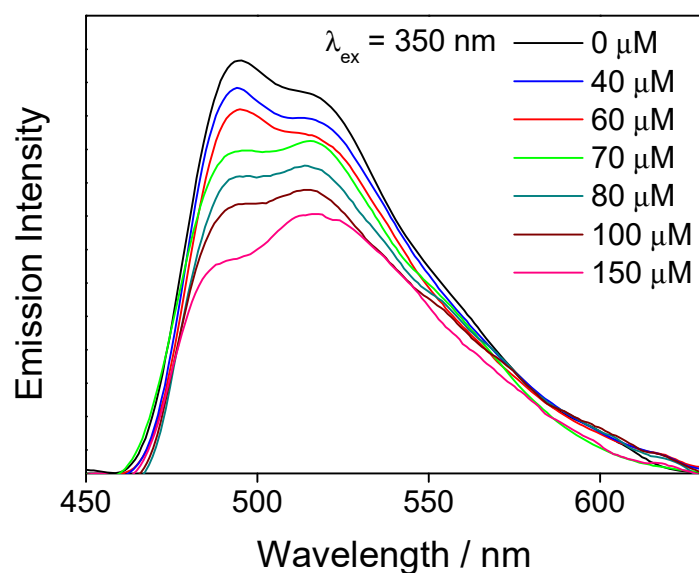

**Fig. S11** Emission spectra of **PTMA-Ir** suspended in an acidic aqueous solution (pH = 2) after incubation in different concentrations of TMA·HCl for 120 min ( $\lambda_{\text{ex}} = 350 \text{ nm}$ ).

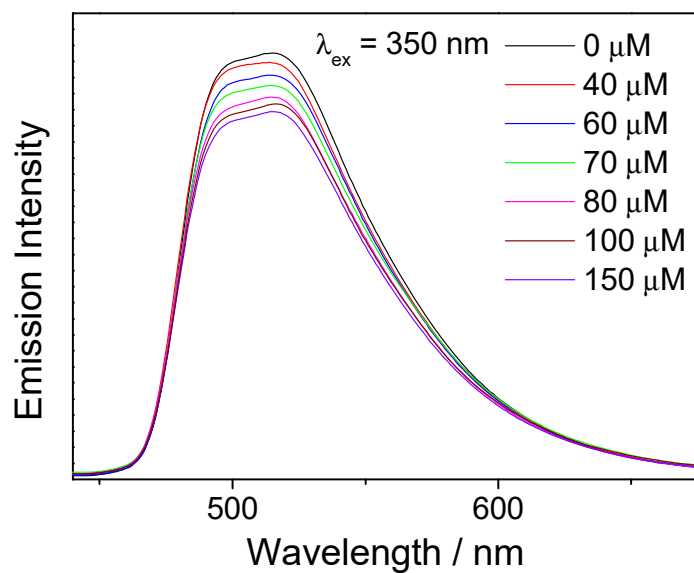

**Fig. S12** Emission spectra of **Ir-2** in  $\text{CH}_3\text{CN}/\text{H}_2\text{O}$  (3:2 v/v) after incubation with different concentrations of TMA·HCl ( $\lambda_{\text{ex}} = 350 \text{ nm}$ ).

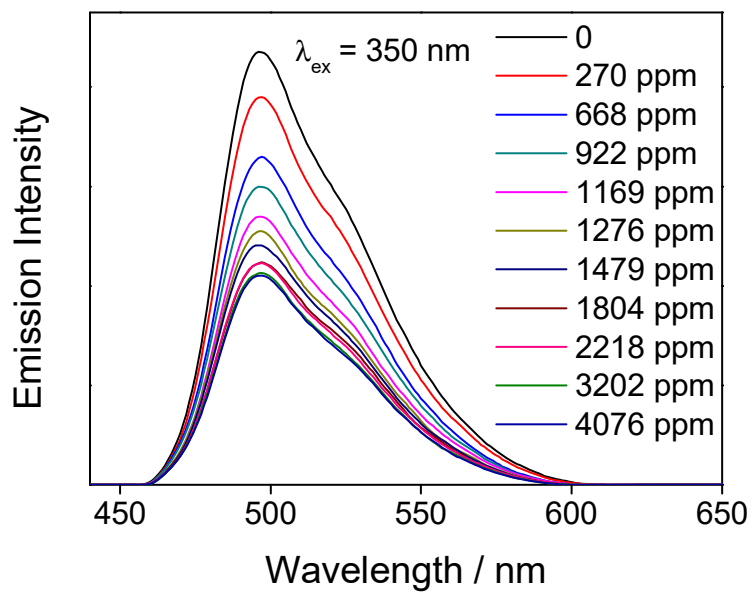

**Fig. S13** Emission spectra of **T-Ir** upon exposure to different concentrations of TMA vapor under an air atmosphere ( $\lambda_{\text{ex}} = 350 \text{ nm}$ ).

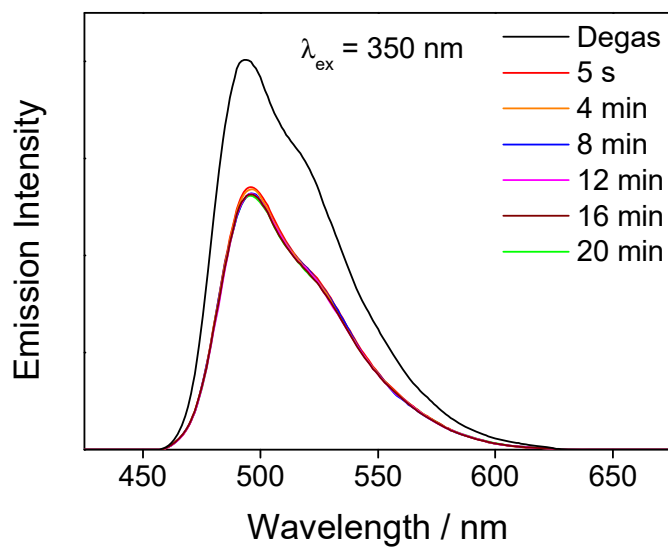

**Fig. S14** Time-dependent emission spectra of **PTMA-Ir** under an argon atmosphere upon exposure to 634 ppm TMA vapor ( $\lambda_{\text{ex}} = 350 \text{ nm}$ ).

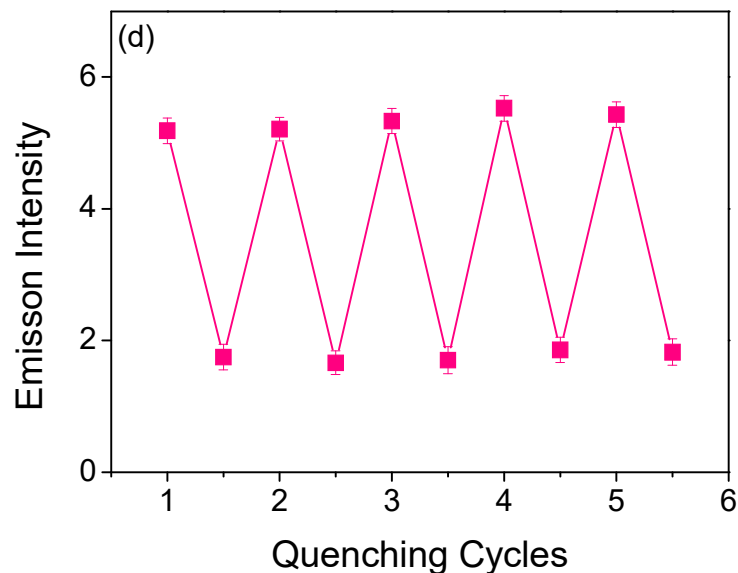

**Fig. S15** Emission responses of **T-Ir** under an air atmosphere upon exposure to 1800 ppm of TMA vapor and removal from TMA vapor over five cycles.

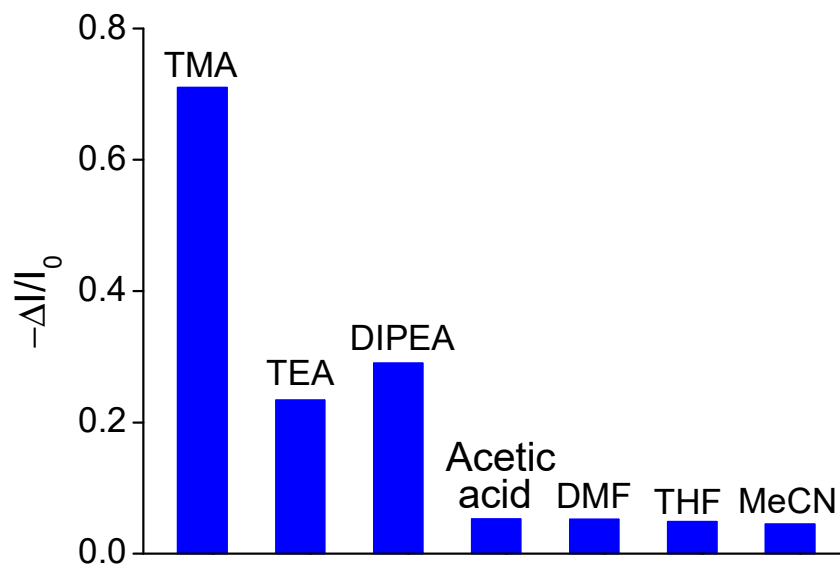

**Fig. S16** Emission quenching of **T-Ir** under an argon atmosphere upon exposure to 3950 ppm vapor of TMA and saturated vapor of other interfering reagents at 20 °C [TEA (~75,000 ppm), DIPEA (~14,100 ppm), acetic acid (~14,800 ppm), DMF (~3,800 ppm), THF (~188,000 ppm) and MeCN (~108,600 ppm)].



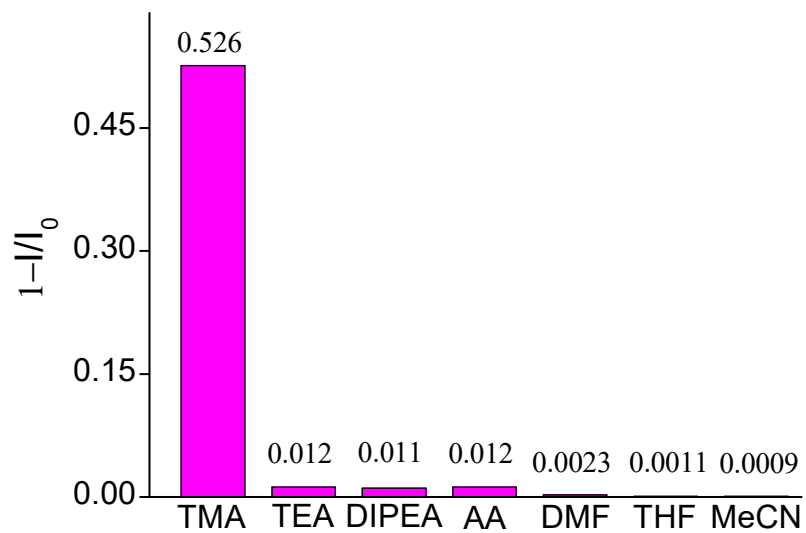

**Fig. S17** Emission quenching of **T-Ir** under an air atmosphere upon exposure to 1800 ppm vapor of TMA and other interfering reagents.

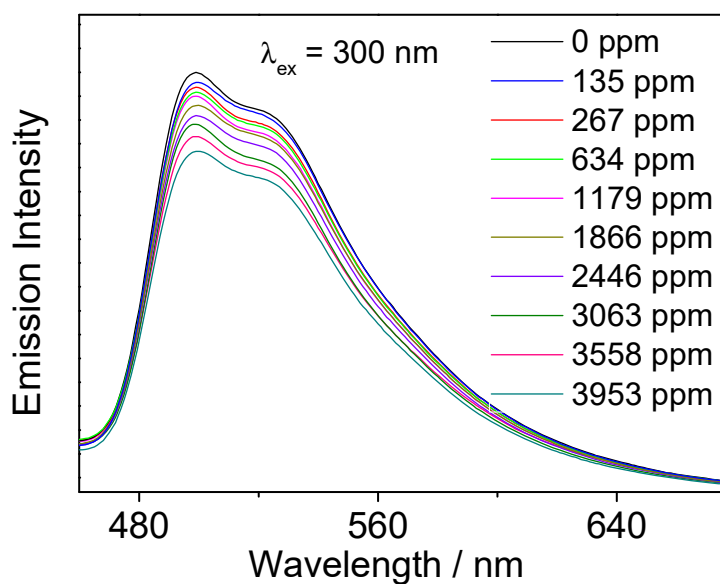

**Fig. S18** Emission spectra of **Ir-2** loaded on a filter paper upon exposure to different concentrations of TMA vapor under an argon atmosphere ( $\lambda_{\text{ex}} = 300 \text{ nm}$ ).

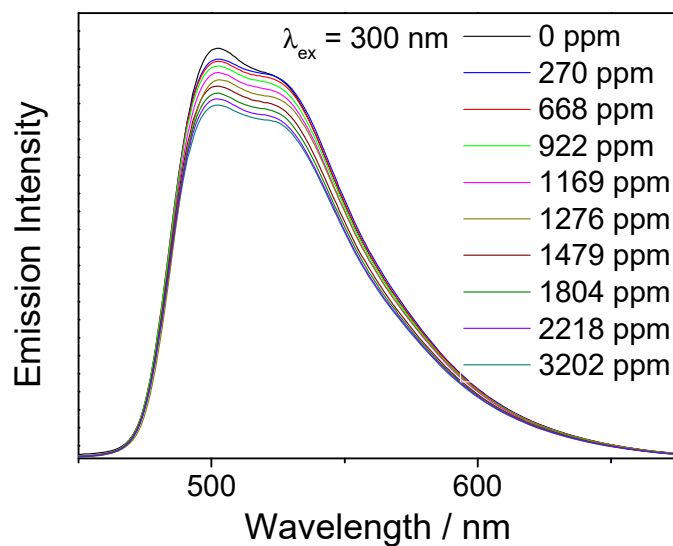

**Fig. S19** Emission spectra of **Ir-2** loaded on a filter paper upon exposure to different concentrations of TMA vapor under an air atmosphere ( $\lambda_{\text{ex}} = 300 \text{ nm}$ ).

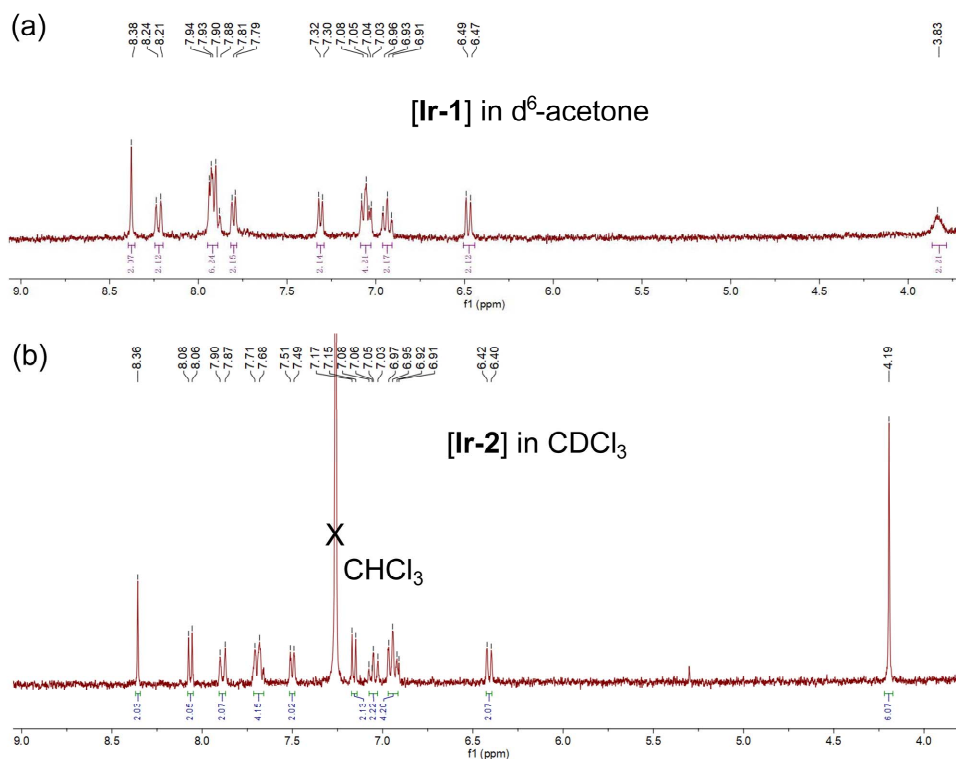

**Fig. S20**  $^1\text{H}$  NMR spectra of (a) **Ir-1** in  $(\text{CD}_3)_2\text{CO}$  and (b) **Ir-2** in  $\text{CDCl}_3$ .

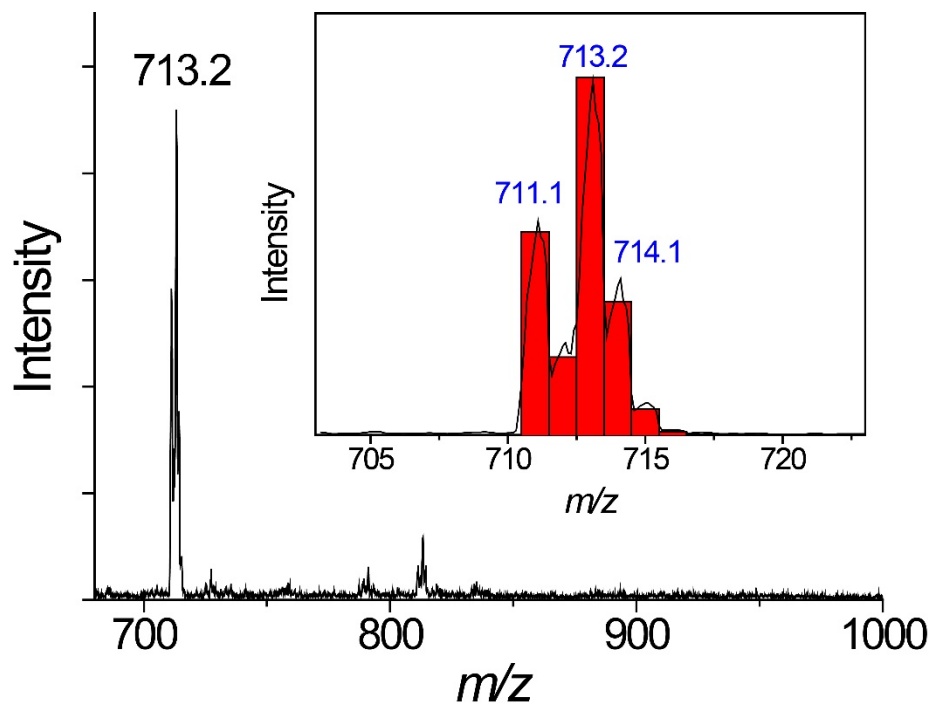

**Fig. S21** Positive ESI mass spectrum of [Ir-1]. The inset shows the expanded ion cluster at  $m/z = 713.2$ .

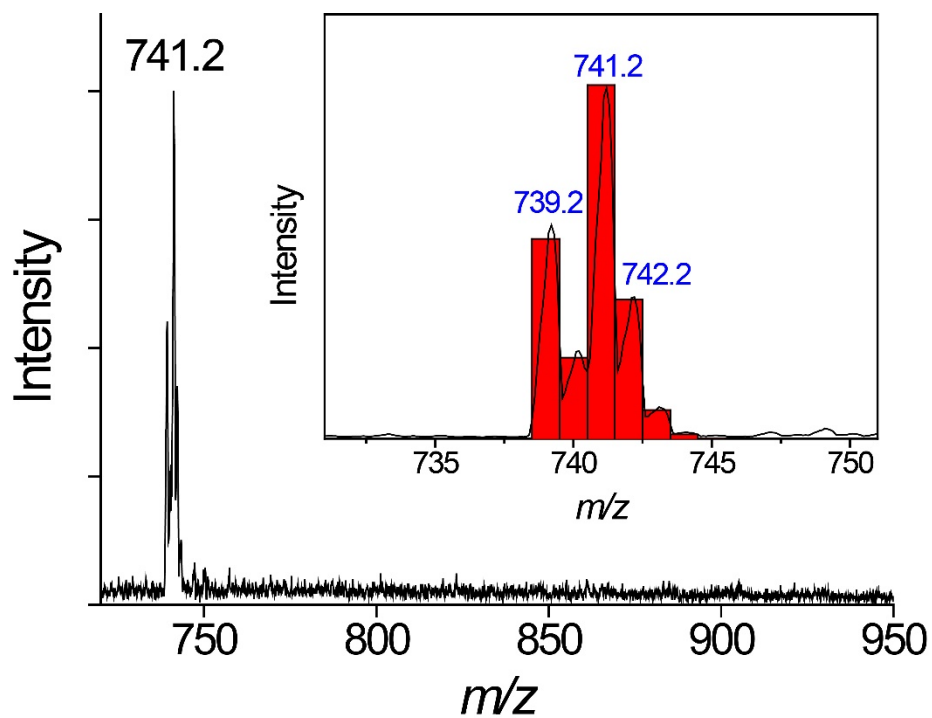

**Fig. S22** Positive ESI mass spectrum of [Ir-2]. The inset shows the expanded ion cluster at  $m/z = 741.2$ .

**Table S1.** Comparison of **PTMA-Ir** sensor with recently reported TMA sensors.

| Sensing Material                                                 | Sensing Temp. (°C) | Tested Range (ppm)   | LOD             | Response Time | Ref.      |
|------------------------------------------------------------------|--------------------|----------------------|-----------------|---------------|-----------|
| MoO <sub>3</sub>                                                 | 300                | 0.1 – 1000           | 0.01 ppm        | 8 s           | [3]       |
| Ru-SnO <sub>2</sub>                                              | 400                | 1 – 5                | 1 ppm           | /             | [4]       |
| Graphene quantum dots / $\alpha$ -Fe <sub>2</sub> O <sub>3</sub> | 270                | 0.01 – 1000          | 0.01 ppm        | 11 s          | [5]       |
| rGO / In <sub>2</sub> O <sub>3</sub>                             | RT                 | 100 – 1500           | 100 ppm         | 2 s           | [6]       |
| $\alpha$ -Fe <sub>2</sub> O <sub>3</sub>                         | 250                | 1 – 100              | 1 ppm           | < 1 min       | [7]       |
| Au / PdO / WO <sub>2.72</sub>                                    | 240                | 1 – 100              | 1 ppm           | 4 s           | [8]       |
| Co <sub>3</sub> O <sub>4</sub> / ZnO                             | 250                | 0.33 – 66            | 130 ppb         | 3 s           | [9]       |
| Au / WO <sub>3</sub>                                             | 300                | 0.5 – 25             | 0.5 ppm         | 8 s           | [10]      |
| PTMA-Ir                                                          | 25                 | 0 – 1179<br>0 – 1276 | 9 ppm<br>15 ppm | 5 s           | This work |

### 3. References

- [1] Liu, R.; Cheng, S.-C.; Xiao, Y.; Chan, K.-C.; Tong, K.-M.; Ko, C.-C. Recyclable Polymer-Supported Iridium-Based Photocatalysts for Photoredox Organic Transformations. *J. Catal.* **2022**, *407*, 206-212.
- [2] Kwok, W. M.; Phillips, D. L.; Yeung, P. K.-Y.; Yam, V. W.-W. Resonance Raman Investigation of the MLCT Transition in  $[\text{Pt}(\text{dppm})_2(\text{PhC}\equiv\text{C})_2]$  and the MMLCT Transition in  $[\text{Pt}_2(\mu\text{-dppm})_2(\mu\text{-PhC}\equiv\text{C})(\text{PhC}\equiv\text{C})_2]^+$ , *J. Phys. Chem. A*, **1997**, *101*, 9286–9295.
- [3] Chu, X.; Liang, S.; Sun, W.; Zhang, W.; Chen, T.; Zhang, Q. Trimethylamine sensing properties of sensors based on  $\text{MoO}_3$  microrods, *Sensors Actuators, B Chem.*, **2010**, *148*, 399–403.
- [4] Kim, K.-M.; Choi, K.-I.; Jeong, H.-M.; Kim, H.-J.; Kim, H.-R.; Lee, J. H. Highly sensitive and selective trimethylamine sensors using Ru-doped  $\text{SnO}_2$  hollow spheres, *Sensors Actuators, B Chem.*, **2012**, *166–167*, 733–738.
- [5] Hu, T.; Chu, X.; Gao, F.; Dong, Y.; Sun, W.; Bai, L. Trimethylamine sensing properties of graphene quantum Dots/ $\alpha\text{-Fe}_2\text{O}_3$  composites, *J. Solid State Chem.*, **2016**, *237*, 284–291.
- [6] Ma, Z.; Song, P.; Yang, Z.; Wang, Q. Trimethylamine detection of 3D rGO/mesoporous  $\text{In}_2\text{O}_3$  nanocomposites at room temperature, *Appl. Surf. Sci.*, **2019**, *465*, 625–634.
- [7] Liu, L.; Fu, S.; Lv, X.; Yue, L.; Fan, L.; Yu, H.; Gao, X.; Zhu, W.; Zhang, W.; Li, X.; Zhu, W. A Gas Sensor With  $\text{Fe}_2\text{O}_3$  Nanospheres Based on Trimethylamine Detection for the Rapid Assessment of Spoilage Degree in Fish, *Front. Bioeng. Biotechnol.*, **2020**, *8*, 1–9.
- [8] Shang, Y.; Shi, R.; Cui, Y.; Che, Q.; Wang, J.; Yang, P. Urchin-Like  $\text{WO}_{2.72}$  Microspheres Decorated with Au and PdO Nanoparticles for the Selective Detection of Trimethylamine, *ACS Appl. Nano Mater.*, **2020**, *3*, 5554–5564.
- [9] Yan, W.; Xu, H.; Ling, M.; Zhou, S.; Qiu, T.; Deng, Y.; Zhao, Z.; Zhang, E. MOF-Derived Porous Hollow  $\text{Co}_3\text{O}_4@ZnO$  Cages for High-Performance MEMS Trimethylamine Sensors, *ACS Sensors*, **2021**, *6*, 2613–2621.
- [10] Zhao, C.; Shen, J.; Xu, S.; Wei, J.; Liu, H.; Xie, S.; Pan, Y.; Zhao, Y.; Zhu, Y. Ultra-efficient trimethylamine gas sensor based on Au nanoparticles sensitized  $\text{WO}_3$  nanosheets for rapid assessment of seafood freshness, *Food Chem.*, **2022**, *392*, 133318.
